# Supplementary material for: BMI Modifies Increased Mortality Risk of Post-PCI STEMI Patients with AKI
Source: MDPI journal article supplement (doi:10.3390/jcm11206104), 2022-10-17
Supplement: s1 [file s1]

Table S1- Baseline characteristics of patients with and without recorded BMI

|                           | BMI not recorded                   | N   | BMI recorded                       | N    | pV     |
|---------------------------|------------------------------------|-----|------------------------------------|------|--------|
| Age                       | 62.1 ± 13.1                        | 519 | 61.6 ± 13.1                        | 1604 | 0.41   |
| Gender (F)                | 22.4%                              | 519 | 18.9%                              | 1604 | 0.08   |
| Smoker                    | 45.9%                              | 519 | 52%                                | 1604 | 0.48   |
| DM                        | 23.3%                              | 519 | 23.4%                              | 1604 | 0.97   |
| HTN                       | 47.4%                              | 519 | 42.5%                              | 1604 | 0.051  |
| HPL                       | 49.1%                              | 519 | 46.4%                              | 1604 | 0.275  |
| Past MI                   | 9.4%                               | 519 | 14.6%                              | 1604 | 0.003  |
| Cr (mg/dL)                | 1.15 ± 0.2                         | 516 | 1.11 ± 0.3                         | 1601 | 0.01   |
| CRP (mg/L)                | 11.6 (1.-12.6)                     | 158 | 13.4 (1.5-10.7)                    | 1202 | 0.186  |
| CPK (U/L)                 | 1172 (291-1607)                    | 504 | 1353 (340-1762)                    | 1579 | 0.02   |
| Hb (g/dL)                 | 14.3 ± 1.5                         | 517 | 14.2 ± 1.6                         | 1602 | 0.287  |
| Time to reperfusion (min) | 378 (112-420)                      | 517 | 403 (105-405)                      | 1576 | 0.91   |
| Contrast volume (ml)      | 141.1 (101-170)                    | 38  | 146.1 (115-174)                    | 380  | 0.39   |
| Hemodynamic instability*  | 6%                                 | 519 | 4.1%                               | 1603 | 0.07   |
| CAD                       | 0-0.2%, 1-42.7%, 2- 30.2%, 3+26.9% | 513 | 3-0.1%, 1-42.5%, 2- 29.1%, 3+28.3% | 1590 | 0.9    |
| EF (%)                    | 48.9% (40-55)                      | 499 | 46.6% (40-50)                      | 1585 | <0.001 |
| AKI                       | 10.0%                              | 499 | 10.6%                              | 1207 | 0.71   |
| Follow up time            | 46.6 ± 29.8                        | 511 | 49.2 ± 30.5                        | 1577 | 0.09   |

Values are mean ±SD, n (%), or median (interquartile range). \*Hemodynamic instability was recorded as patients' need for inotropes or intra-aortic balloon.

CAD= Number of vessels with significant coronary artery disease; CPK= Creatine phosphokinase; Cr= Creatinine on admission; CRP= C reactive protein; DM= Diabetes Mellitus; EF= Ejection fraction; Hb= Hemoglobin; HPL= Hyperlipidemia; HTN= Hypertension; min= Minutes; wks= Weeks; yrs= Years.

Table S2- Baseline characteristics of patients with and without recorded AKI

|                           | AKI not recorded                        | N   | AKI recorded                               | N    | pV     |
|---------------------------|-----------------------------------------|-----|--------------------------------------------|------|--------|
| Age                       | 62.7 ± 13.9                             | 417 | 61.4 ± 12.9                                | 1706 | 0.08   |
| Gender (F)                | 20.4%                                   | 417 | 19.6%                                      | 1706 | 0.71   |
| BMI                       | 26.9 ± 4.2                              | 400 | 26.8 ± 4.0                                 | 1223 | 0.95   |
| Smoker                    | 52%                                     | 417 | 50.1%                                      | 1706 | 0.48   |
| DM                        | 30%                                     | 417 | 21.7%                                      | 1706 | <0.001 |
| HTN                       | 46.5%                                   | 417 | 43%                                        | 1706 | 0.197  |
| HPL                       | 47%                                     | 417 | 47.1%                                      | 1706 | 0.98   |
| Past MI                   | 23.3%                                   | 417 | 10.9%                                      | 1706 | <0.001 |
| Cr (mg/dL)                | 1.05 ± 0.5                              | 414 | 1.14 ± 0.2                                 | 1705 | <0.001 |
| CRP (mg/L)                | 14.9 (1.8-10.5)                         | 409 | 12.4 (1.4-11.2)                            | 951  | 0.14   |
| CPK (U/L)                 | 1427 (395-1824)                         | 414 | 1280 (317-1649)                            | 1669 | 0.005  |
| Hb (g/dL)                 | 14.0 ± 1.7                              | 415 | 14.3 ± 1.5                                 | 1704 | <0.001 |
| Time to reperfusion (min) | 462 (104-450)                           | 388 | 382 (105-405)                              | 1705 | 0.731  |
| Contrast volume (ml)      |                                         | 0   |                                            | 418  |        |
| Hemodynamic instability*  | 7.9%                                    | 417 | 3.8%                                       | 1705 | <0.001 |
| CAD                       | 0-0%, 1- 35.2%,<br>2- 28.7%,<br>3+36.2% | 401 | 3-0.2%, 1-<br>44.2%,<br>2- 29.6%,<br>3+26% | 1702 | <0.001 |
| EF (%)                    | 45.9% (40-50)                           | 413 | 47% (40-55)                                | 1681 | 0.002  |
| Follow up time            | 49.9 ± 31.1                             | 413 | 48.3 ± 30.1                                | 1675 | 0.33   |

Values are mean ±SD, n (%), or median (interquartile range). \*Hemodynamic instability was recorded as patients' need for inotropes or intra-aortic balloon.

CAD= Number of vessels with significant coronary artery disease; CPK= Creatine phosphokinase; Cr= Creatinine on admission; CRP= C reactive protein; DM= Diabetes Mellitus; EF= Ejection fraction; Hb= Hemoglobin; HPL= Hyperlipidemia; HTN= Hypertension; min= Minutes; wks= Weeks; yrs= Years.

Table S3- BMI Class frequencies

|           | Cohort      | With AKI   | Without AKI |
|-----------|-------------|------------|-------------|
| <18.5     | 14 (0.7%)   | 1 (0.8%)   | 12 (1.1%)   |
| 18.6-24.9 | 546 (25.5%) | 41 (32%)   | 375 (34.8%) |
| 25-29.9   | 730 (34.1%) | 59 (46.1%) | 478 (44.3%) |
| 30-39.9   | 303 (14.2%) | 27 (21.1%) | 207 (19.2%) |
| >40       | 12 (0.6%)   | 0          | 7 (0.6%)    |
